# Supplementary material
Source: Springer Nature journal article supplement (https://www.springermedizin.de/resource/supplementary/12245_2011_87_MOESM3_ESM.pdf/9672736)
Supplement: MOESM3 [file 9672736]

**HTN**

```
graph LR; A[HTN] --> B[Failed Auto regulation]; B --> C[Hyper perfusion Injury];
```

The diagram is a horizontal flowchart with three rectangular boxes connected by arrows. The first box on the left contains the text 'HTN'. An arrow points from this box to a second box in the middle containing the text 'Failed Auto regulation'. A second arrow points from the middle box to a third box on the right containing the text 'Hyper perfusion' on the top line and 'Injury' on the bottom line. All boxes have an orange border and white background.

**Failed Auto regulation**

**Hyper perfusion**  
**Injury**
